# Supplementary material for: Comparative structural and evolutionary analyses predict functional sites in the artemisinin resistance malaria protein K13
Source: PubMed Central journal article supplement (PMC6650413; doi:10.1038/s41598-019-47034-6), 2019-07-23
Supplement: 41598_2019_47034_MOESM2_ESM.pdf [file 41598_2019_47034_MOESM2_ESM.pdf]

## Supplementary Tables

This supplemental file has been provided by the authors to give readers additional information about their work.

Supplement to: **Comparative structural and evolutionary analyses predict functional sites in the artemisinin resistance malaria protein K13**

By Romain Coppée, Daniel C. Jeffares, Maria A. Miteva, Audrey Sabbagh, Jérôme Clain

|                       |          |
|-----------------------|----------|
| <b>Table S1</b> ..... | <b>2</b> |
| <b>Table S2</b> ..... | <b>4</b> |
| <b>Table S3</b> ..... | <b>5</b> |
| <b>Table S4</b> ..... | <b>6</b> |
| <b>Table S5</b> ..... | <b>7</b> |
| <b>Table S6</b> ..... | <b>8</b> |

**Note :** Some tables are on multiple pages.

**Table S1. List of K13 orthologous sequences used in this study.**

| Accession Number <sup>a</sup> | Species                             | Abbreviation <sup>b</sup> | Description                                                           | Source   | Length <sup>c</sup> | Hosts <sup>d</sup> |
|-------------------------------|-------------------------------------|---------------------------|-----------------------------------------------------------------------|----------|---------------------|--------------------|
| PF3D7_1343700                 | <i>Plasmodium falciparum</i>        | Pfal                      | Kelch protein kelch-13                                                | PlasmoDB | 726                 | Humans             |
| XP_012764805.1                | <i>Plasmodium reichenowi</i>        | Prei                      | Kelch protein, putative                                               | NCBI     | 724                 | Monkeys            |
| XP_018640212.1                | <i>Plasmodium gaboni</i>            | Pgab                      | Putative kelch protein K13                                            | NCBI     | 725                 | Monkeys            |
| XP_001614215.1                | <i>Plasmodium vivax</i>             | Pviv                      | Kelch domain-containing protein                                       | NCBI     | 712                 | Humans / Monkeys   |
| XP_008815744.1                | <i>Plasmodium inui</i>              | Pinu                      | Hypothetical protein C922_01923                                       | NCBI     | 712                 | Monkeys            |
| XP_002259918.1                | <i>Plasmodium knowlesi</i>          | Pkno                      | Kelch-motif containing protein                                        | NCBI     | 712                 | Humans / Monkeys   |
| XP_012337473.1                | <i>Plasmodium fragile</i>           | Pfra                      | Hypothetical protein AK88_04440                                       | NCBI     | 712                 | Monkeys            |
| PCYB_122000                   | <i>Plasmodium cynomolgi</i>         | Pcyn                      | Kelch domain-containing protein                                       | PlasmoDB | 713                 | Monkeys            |
| XP_008622491.1                | <i>Plasmodium vinckei vinckei</i>   | Pvin                      | Hypothetical protein YYE_00585                                        | NCBI     | 738                 | Rodents            |
| EUD71747.1                    | <i>Plasmodium vinckei petteri</i>   | Ppet                      | Hypothetical protein YYG_03164                                        | NCBI     | 738                 | Rodents            |
| CDR16038.1                    | <i>Plasmodium chabaudi chabaudi</i> | Pcha                      | Kelch protein kelch-13, putative                                      | NCBI     | 738                 | Rodents            |
| SCM11204.1                    | <i>Plasmodium chabaudi adami</i>    | Pada                      | Kelch protein K13, putative                                           | NCBI     | 738                 | Rodents            |
| XP_730901.1                   | <i>Plasmodium yoelii</i>            | Pyoe                      | Hypothetical protein                                                  | NCBI     | 738                 | Rodents            |
| CDS51002.1                    | <i>Plasmodium berghei</i>           | Pber                      | Kelch protein kelch-13, putative                                      | NCBI     | 738                 | Rodents            |
| PCOAH_00041530                | <i>Plasmodium coatneyi</i>          | Pcoa                      | Uncharacterized protein                                               | PlasmoDB | 712                 | Monkeys            |
| PGAL8A_00254800               | <i>Plasmodium gallinaceum</i>       | Pgal                      | Kelch protein K13, putative                                           | PlasmoDB | 706                 | Birds              |
| PRELSG_1254200                | <i>Plasmodium relictum</i>          | Prel                      | Kelch protein K13, putative                                           | PlasmoDB | 704                 | Birds              |
| GAW82138.1                    | <i>Plasmodium gonderi</i>           | Pgon                      | Kelch protein K13                                                     | NCBI     | 712                 | Monkeys            |
| PmUG01_12021200               | <i>Plasmodium malariae</i>          | Pmal                      | Kelch protein K13, putative                                           | PlasmoDB | 714                 | Humans             |
| ANG83523.1                    | <i>Plasmodium ovale wallikeri</i>   | Pwal                      | Kelch protein K13, partial                                            | NCBI     | 687                 | Humans             |
| PocGH01_12019400              | <i>Plasmodium ovale curtisi</i>     | Pcur                      | Kelch protein K13, putative                                           | PlasmoDB | 725                 | Humans             |
| ESS31969.1                    | <i>Toxoplasma gondii</i>            | Tgon                      | Kelch repeat and K+ channel tetramerisation domain containing protein | NCBI     | 818                 | —                  |
| XP_008882882.1                | <i>Hammondia hammondi</i>           | Hham                      | Kelch repeat and K+ channel tetramerisation domain containing protein | NCBI     | 820                 | —                  |
| XP_003882792.1                | <i>Neospora caninum</i>             | Ncan                      | Kelch motif domain-containing protein                                 | NCBI     | 804                 | —                  |
| XP_013247290.1                | <i>Eimeria acervulina</i>           | Eace                      | Kelch motif domain-containing protein                                 | NCBI     | 654                 | —                  |
| EfaB_MINUS_11414              | <i>Eimeria falciformis</i>          | Efal                      | Unspecified product                                                   | ToxoDB   | 662                 | —                  |
| CDJ54128.1                    | <i>Eimeria brunetti</i>             | Ebru                      | Kelch motif domain-containing protein, putative                       | NCBI     | 506                 | —                  |
| Ebh_scaff_2461                |                                     |                           |                                                                       | GeneDB   |                     |                    |
| Ebh_scaff_22                  |                                     |                           |                                                                       |          |                     |                    |
| XP_013334533.1                | <i>Eimeria maxima</i>               | Emax                      | Kelch motif domain-containing protein, putative                       | NCBI     | 509                 | —                  |
| Ema_scaff_872                 |                                     |                           |                                                                       | GeneDB   |                     |                    |

| Accession Number <sup>a</sup> | Species                            | Abbreviation <sup>b</sup> | Description <sup>c</sup>                                                        | Source   | Length <sup>d</sup> | Hosts <sup>e</sup> |
|-------------------------------|------------------------------------|---------------------------|---------------------------------------------------------------------------------|----------|---------------------|--------------------|
| XP_012648586.1                | <i>Babesia microti</i>             | Bmic                      | Uncharacterized protein                                                         | NCBI     | 557                 | —                  |
| XP_766008.1                   | <i>Theileria parva</i>             | Tpar                      | Hypothetical protein                                                            | NCBI     | 576                 | —                  |
| XP_004829715.1                | <i>Theileria equi</i>              | Tequ                      | Kelch repeat domain containing protein                                          | NCBI     | 556                 | —                  |
| XP_009689263.1                | <i>Theileria orientalis</i>        | Tori                      | Uncharacterized protein<br>TOT_010000427                                        | NCBI     | 603                 | —                  |
| XP_001609009.1                | <i>Babesia bovis</i>               | Bbov                      | Kelch repeat and K+ channel tetramerisation domain containing protein           | NCBI     | 569                 | —                  |
| tann.chr01                    | <i>Theileria annulata</i>          | Tann                      | Protein with kelch domain                                                       | GeneDB   | 576                 | —                  |
| XP_012767816.1                | <i>Babesia bigemina</i>            | Bbig                      | Kelch repeat and K+ channel tetramerisation domain containing protein, putative | NCBI     | 634                 | —                  |
| XP_002141433.1                | <i>Cryptosporidium muris</i>       | Cmur                      | Kelch motif family protein                                                      | NCBI     | 561                 | —                  |
| XP_667484.1                   | <i>Cryptosporidium hominis</i>     | Chom                      | Hypothetical protein                                                            | NCBI     | 579                 | —                  |
| CmeUKMEL1_04065               | <i>Cryptosporidium meleagridis</i> | Cmel                      | Kelch motif family protein                                                      | CryptoDB | 580                 | —                  |
| cubi_02935                    | <i>Cryptosporidium ubiquitum</i>   | Cubi                      | KELCH domain-containing protein                                                 | CryptoDB | 580                 | —                  |
| Cbai_ctg7180000000685         | <i>Cryptosporidium baileyi</i>     | Cbai                      | —                                                                               | CryptoDB | 566                 | —                  |
| cand_030750                   | <i>Cryptosporidium andersoni</i>   | Cand                      | Kelch motif family protein                                                      | CryptoDB | 561                 | —                  |
| XP_628432.1                   | <i>Cryptosporidium parvum</i>      | Cpar                      | POZ+kelch domain protein with kelch repeats at the C-terminus                   | NCBI     | 580                 | —                  |
| SN3_01300125                  | <i>Sarcocystis neurona</i>         | Sneu                      | Kelch protein                                                                   | ToxoDB   | 707                 | —                  |

<sup>a</sup> Identifier of the protein sequence retrieved from sequence databases.

<sup>b</sup> Four-letter species code used in [Supplementary Figure S1](#).

<sup>c</sup> Number of amino acids.

<sup>d</sup> Vertebrate host(s) are only provided for *Plasmodium* species.

**Table S2. Results of PAML analyses for the *k13* gene.**

| Model                            | <i>l</i>  | Parameters                                                                                                                                                                       | $\kappa$ | Positively selected codons |
|----------------------------------|-----------|----------------------------------------------------------------------------------------------------------------------------------------------------------------------------------|----------|----------------------------|
| FR (free-ratio)                  | -29,511.0 | $\omega$ can vary between branches                                                                                                                                               | 1.19     | NA                         |
| M0 (one-ratio)                   | -29,739.4 | $\omega = 0.022$                                                                                                                                                                 | 1.39     | NA                         |
| M1a (neutral)                    | -29,727.8 | $\omega_0 = 0.021, p_0 = 0.994$<br>$\omega_1 = 1.000, p_1 = 0.006$                                                                                                               | 1.41     | NA                         |
| M2a (selection)                  | -29,727.8 | $\omega_0 = 0.021, p_0 = 0.994$<br>$\omega_1 = 1.000, p_1 = 0.002$<br>$\omega_2 = 1.000, p_2 = 0.004$                                                                            | 1.41     | None detected              |
| M3 (discrete)<br>( <i>k</i> = 5) | -29,216.3 | $\omega_0 = 0.0002, p_0 = 0.105$<br>$\omega_1 = 0.0065, p_1 = 0.245$<br>$\omega_2 = 0.0202, p_2 = 0.420$<br>$\omega_3 = 0.0491, p_3 = 0.210$<br>$\omega_4 = 0.1100, p_4 = 0.020$ | 1.43     | None detected              |
| M7 (beta)                        | -29,225.2 | $\beta(0.98, 40.98)$<br>$\omega \leq 1.00, p = 1.000$                                                                                                                            | 1.43     | NA                         |
| M8 (beta& $\omega$ )             | -29,225.2 | $\beta(0.98, 40.98)$<br>$\omega \leq 1.00, p_0 = 0.999$                                                                                                                          | 1.43     | None detected              |

$\omega$ ,  $d_N/d_S$  ratio;  $p_n$ , proportion of codon sites in the site class  $\omega_n$ ; *l*, log-likelihood value;  $\kappa$ , transition/transversion rate ratio;  $\beta(p, q)$ , shape parameters for the  $\beta$ -distribution of  $\omega$ . Candidate codon sites for positive selection are identified using the Bayes empirical Bayes (BEB) inference for models M2a and M8, and the Naïve empirical Bayes (NEB) inference for model M3.

**Table S3. Distribution of the conserved KREP shallow pocket positions for K13 and some BTB-Kelch proteins.**

| Protein                | Conservation level <sup>a</sup> | Shallow pocket positions <sup>b</sup> | Remaining positions | <i>p</i> value         |
|------------------------|---------------------------------|---------------------------------------|---------------------|------------------------|
| K13 <sub>KREP</sub>    | High                            | 9                                     | 20                  | $1.60 \times 10^{-5}$  |
|                        | Others                          | 10                                    | 245                 |                        |
| KEAP1 <sub>KREP</sub>  | High                            | 12                                    | 17                  | $1.44 \times 10^{-7}$  |
|                        | Others                          | 12                                    | 244                 |                        |
| KLHL2 <sub>KREP</sub>  | High                            | 13                                    | 16                  | $1.26 \times 10^{-10}$ |
|                        | Others                          | 6                                     | 251                 |                        |
| KLHL3 <sub>KREP</sub>  | High                            | 12                                    | 17                  | $1.36 \times 10^{-9}$  |
|                        | Others                          | 6                                     | 251                 |                        |
| KLHL12 <sub>KREP</sub> | High                            | 14                                    | 15                  | $2.94 \times 10^{-12}$ |
|                        | Others                          | 5                                     | 255                 |                        |

<sup>a</sup> The KREP positions were categorized into two groups: the *high* conservation level group contained the 10% most conserved positions according to the  $\lambda$  substitution rates, the *others* group included the KREP positions with lower levels of conservation. <sup>b</sup> The shallow pocket of K13 KREP was defined as the positions forming the surface plan of the pocket and protruding out of the plan. A view and delineation of the PfK13 KREP shallow pocket is provided in [Supplementary Figure S7](#). The same structural delineation of the KREP shallow pocket was applied to the four other BTB-Kelch KREP domains. Contingency tables were subjected to chi-squared test.

**Table S4. Conservation level of the protein sites associated with artemisinin resistance or artemisinin sensitive mutations.**

| AA <sup>a</sup><br>position | Ref. AA <sup>a</sup><br>( <i>P. fal</i> ) | PfK13 mutant <sup>b</sup> | Amino acid variation across <i>Apicomplexa</i> species |                                                         | $\lambda$ -based rank<br>n. (%) <sup>c</sup> |
|-----------------------------|-------------------------------------------|---------------------------|--------------------------------------------------------|---------------------------------------------------------|----------------------------------------------|
|                             |                                           |                           | <i>Plasmodium</i> (n = 21)                             | Non- <i>Plasmodium</i> (n = 22)                         |                                              |
| <b>446</b>                  | <b>F</b>                                  | <b>F446I</b>              | <b>F (21)</b>                                          | <b>F (9); Y (7); L (6)</b>                              | <b>110 (38.73)</b>                           |
| 449                         | G                                         | G449A                     | G (21)                                                 | G (22)                                                  | 32 (11.27)                                   |
| 452                         | D                                         | D452E                     | D (21)                                                 | N (14); S (4); D (4)                                    | 164 (57.75)                                  |
| <b>458</b>                  | <b>N</b>                                  | <b>N458Y</b>              | <b>N (20); S (1)</b>                                   | <b>N (6); D (6); R (5); K (2); S (1); G (1); P (1)</b>  | <b>222 (78.17)</b>                           |
| 469                         | C                                         | C469Y                     | C (21)                                                 | C (10); G (4); V (3); R (2); K (1); Q (1); N (1)        | 185 (65.14)                                  |
| <b>476</b>                  | <b>M</b>                                  | <b>M476I</b>              | <b>M (21)</b>                                          | <b>M (21); L (1)</b>                                    | <b>81 (28.52)</b>                            |
| 479                         | K                                         | K479I                     | K (21)                                                 | E (13); P (4); A (3); S (2)                             | 117 (41.20)                                  |
| 481                         | A                                         | A481V                     | A (21)                                                 | A (13); M (7); I (1); T (1)                             | 96 (33.80)                                   |
| <b>493</b>                  | <b>Y</b>                                  | <b>Y493H</b>              | <b>Y (21)</b>                                          | <b>Y (10); A (5); F (4); C (3)</b>                      | <b>136 (47.89)</b>                           |
| 515                         | R                                         | R515K                     | R (21)                                                 | R (12); I (4); L (3); T (3)                             | 103 (36.27)                                  |
| 522                         | S                                         | S522C                     | S (21)                                                 | A (13); P (5); K (2); S (1); Q (1)                      | 194 (68.31)                                  |
| 527                         | P                                         | P527H                     | P (21)                                                 | P (13); G (5); A (4)                                    | 71 (25.00)                                   |
| 537                         | N                                         | N537I; N537D              | N (21)                                                 | D (10); G (5); E (2); N (2); S (1); A (1); R (1)        | 271 (95.42)                                  |
| 538                         | G                                         | G538V                     | G (21)                                                 | G (10); N (3); D (3); E (2); S (2); A (1); K (1)        | 242 (85.21)                                  |
| <b>539</b>                  | <b>R</b>                                  | <b>R539T</b>              | <b>R (21)</b>                                          | <b>R (22)</b>                                           | <b>74 (26.06)</b>                            |
| <b>543</b>                  | <b>I</b>                                  | <b>I543T</b>              | <b>I (21)</b>                                          | <b>I (10); V (10); A (2)</b>                            | <b>137 (48.24)</b>                           |
| <b>553</b>                  | <b>P</b>                                  | <b>P553L</b>              | <b>P (21)</b>                                          | <b>S (10); D (6); K (3); A (2); G (1)</b>               | <b>209 (73.59)</b>                           |
| <b>561</b>                  | <b>R</b>                                  | <b>R561H</b>              | <b>R (21)</b>                                          | <b>R (22)</b>                                           | <b>36 (12.68)</b>                            |
| 568                         | V                                         | V568G                     | V (13); I (8)                                          | V (9); L (4); S (3); A (2); G (2); M (1); C (1)         | 263 (92.61)                                  |
| 574                         | P                                         | P574L                     | P (21)                                                 | P (20); A (2)                                           | 85 (29.93)                                   |
| 575                         | R                                         | R575K                     | R (21)                                                 | R (22)                                                  | 15 (5.28)                                    |
| #578                        | A                                         | A578S                     | A (12); S (8); C (1)                                   | A (20); P (2)                                           | 76 (26.76)                                   |
| 579                         | M                                         | M579I                     | M (21)                                                 | M (15); S (6); C (1)                                    | 114 (40.14)                                  |
| <b>580</b>                  | <b>C</b>                                  | <b>C580Y</b>              | <b>C (19); S (2)</b>                                   | <b>C (14); V (4); L (2); I (1); A (1)</b>               | <b>183 (64.44)</b>                           |
| 584                         | D                                         | D584V                     | D (20); E (1)                                          | D (9); N (7); G (4); E (2)                              | 158 (55.63)                                  |
| 667                         | P                                         | P667T                     | P (21)                                                 | P (12); E (3); A (2); C (1); S (1); I (1); D (1); N (1) | 252 (88.73)                                  |
| 673                         | F                                         | F673I                     | F (21)                                                 | C (11); A (5); S (3); T (2); G (1)                      | 186 (65.49)                                  |
| 675                         | A                                         | A675V                     | A (17); S (4)                                          | A (8); I (6); M (4); L (2); V (2)                       | 219 (77.11)                                  |
| 719                         | H                                         | H719N                     | H (20); ? (1)                                          | H (22)                                                  | 28 (9.86)                                    |

Note – <sup>a</sup> AA: amino acid position. Ref. AA indicates the wild type residue in PfK13. <sup>b</sup> Validated and candidate PfK13 artemisinin resistance mutations (according to WHO) are shown in bold and normal letters, respectively; A578S (indicated with the # symbol) does not confer resistance to artemisinin. <sup>c</sup> The rank attributed to positions was based on the site-specific substitution rates  $\lambda$  ([Supplementary Dataset S1](#)) estimated for the 284 studied Kelch-repeat propeller (KREP) positions using FuncPatch. The lower the rank, the more conserved was the position.

**Table S5. List of BTB-containing sequences used for the different BTB-containing protein families.**

| Accession Number <sup>a</sup> | Protein   | Protein family <sup>b</sup> | Species                     | Length | Description <sup>c</sup>                                                       | Extended BTB <sup>d</sup> |
|-------------------------------|-----------|-----------------------------|-----------------------------|--------|--------------------------------------------------------------------------------|---------------------------|
| Q8H1D3                        | NPY1      | BTB-NPH3                    | <i>Arabidopsis thaliana</i> | 571    | BTB/POZ domain-containing protein NPY1                                         | yes (C-ter only)          |
| O80970                        | NPY2      | BTB-NPH3                    | <i>Arabidopsis thaliana</i> | 634    | BTB/POZ domain-containing protein NPY2                                         | yes (C-ter only)          |
| Q9FN09                        | NPY3      | BTB-NPH3                    | <i>Arabidopsis thaliana</i> | 579    | BTB/POZ domain-containing protein NPY3                                         | yes (C-ter only)          |
| O64814                        | NPY4      | BTB-NPH3                    | <i>Arabidopsis thaliana</i> | 481    | BTB/POZ domain-containing protein NPY4                                         | yes (C-ter only)          |
| Q0WL52                        | NPY5      | BTB-NPH3                    | <i>Arabidopsis thaliana</i> | 580    | BTB/POZ domain-containing protein NPY5                                         | yes (C-ter only)          |
| O15156                        | ZBTB7B    | BTB-ZF                      | <i>Homo sapiens</i>         | 539    | Zinc finger and BTB domain-containing protein 7B                               | yes (C-ter only)          |
| Q96BR9                        | ZBTB8A    | BTB-ZF                      | <i>Homo sapiens</i>         | 441    | Zinc finger and BTB domain-containing protein 8A                               | yes (C-ter only)          |
| Q05516                        | ZBTB16    | BTB-ZF                      | <i>Homo sapiens</i>         | 673    | Zinc finger and BTB domain-containing protein 16                               | yes (C-ter only)          |
| Q9HC78                        | ZBTB20    | BTB-ZF                      | <i>Homo sapiens</i>         | 741    | Zinc finger and BTB domain-containing protein 20                               | yes (C-ter only)          |
| O43298                        | ZBTB43    | BTB-ZF                      | <i>Homo sapiens</i>         | 467    | Zinc finger and BTB domain-containing protein 43                               | yes (C-ter only)          |
| O95198                        | KLHL2     | BTB-Kelch                   | <i>Homo sapiens</i>         | 593    | Kelch-like protein 2                                                           | yes                       |
| Q53G59                        | KLHL12    | BTB-Kelch                   | <i>Homo sapiens</i>         | 568    | Kelch-like protein 12                                                          | yes                       |
| Q14145                        | KLHL19    | BTB-Kelch                   | <i>Homo sapiens</i>         | 624    | Kelch-like ECH-associated protein 1                                            | yes                       |
| O60662                        | KLHL41    | BTB-Kelch                   | <i>Homo sapiens</i>         | 606    | Kelch-like protein 41                                                          | yes                       |
| O94844                        | RHOBTB1   | RhoBTB                      | <i>Homo sapiens</i>         | 696    | Rho-related BTB domain-containing protein 1                                    | yes                       |
| Q9BYZ6                        | RHOBTB2   | RhoBTB                      | <i>Homo sapiens</i>         | 727    | Rho-related BTB domain-containing protein 2                                    | yes                       |
| O94955                        | RHOBTB3   | RhoBTB                      | <i>Homo sapiens</i>         | 611    | Rho-related BTB domain-containing protein 3                                    | yes                       |
| Q8L765                        | BPM1      | MATH-BTB                    | <i>Arabidopsis thaliana</i> | 407    | BTB/POZ and MATH domain-containing protein 1                                   | yes                       |
| Q9M8J9                        | BPM2      | MATH-BTB                    | <i>Arabidopsis thaliana</i> | 406    | BTB/POZ and MATH domain-containing protein 2                                   | yes                       |
| O22286                        | BPM3      | MATH-BTB                    | <i>Arabidopsis thaliana</i> | 408    | BTB/POZ and MATH domain-containing protein 3                                   | yes                       |
| Q9SRV1                        | BPM4      | MATH-BTB                    | <i>Arabidopsis thaliana</i> | 465    | BTB/POZ and MATH domain-containing protein 4                                   | yes                       |
| Q1EBV6                        | BPM5      | MATH-BTB                    | <i>Arabidopsis thaliana</i> | 410    | BTB/POZ and MATH domain-containing protein 5                                   | yes                       |
| Q8TBC3                        | SHKBP1    | KCTD-like                   | <i>Homo sapiens</i>         | 707    | SH3KBP1-binding protein 1                                                      | no                        |
| Q719H9                        | KCTD1     | KCTD                        | <i>Homo sapiens</i>         | 257    | BTB/POZ domain-containing protein KCTD1                                        | no                        |
| Q8NC69                        | KCTD6     | KCTD                        | <i>Homo sapiens</i>         | 237    | BTB/POZ domain-containing protein KCTD6                                        | no                        |
| Q8WZ19                        | KCTD13    | KCTD                        | <i>Homo sapiens</i>         | 329    | BTB/POZ domain-containing adapter for CUL3-mediated RhoA degradation protein 1 | no                        |
| Q8N5Z5                        | KCTD17    | KCTD                        | <i>Homo sapiens</i>         | 321    | BTB/POZ domain-containing protein KCTD17                                       | no                        |
| Q09470                        | KCNA1     | KCNA                        | <i>Homo sapiens</i>         | 495    | Potassium voltage-gated channel subfamily A member 1                           | no                        |
| P16389                        | KCNA2     | KCNA                        | <i>Homo sapiens</i>         | 499    | Potassium voltage-gated channel subfamily A member 2                           | no                        |
| P22001                        | KCNA3     | KCNA                        | <i>Homo sapiens</i>         | 575    | Potassium voltage-gated channel subfamily A member 3                           | no                        |
| P22459                        | KCNA4     | KCNA                        | <i>Homo sapiens</i>         | 653    | Potassium voltage-gated channel subfamily A member 4                           | no                        |
| P22460                        | KCNA5     | KCNA                        | <i>Homo sapiens</i>         | 613    | Potassium voltage-gated channel subfamily A member 5                           | no                        |
| P63208                        | SKP1      | —                           | <i>Homo sapiens</i>         | 163    | S-phase kinase-associated protein 1                                            | yes (N-ter only)          |
| Q15369                        | Elongin C | —                           | <i>Homo sapiens</i>         | 112    | Elongin-C                                                                      | no                        |

<sup>a</sup> Identifier of the protein sequence retrieved from the UniProtKB database.

<sup>b</sup> BTB-containing proteins are classified into different families or subfamilies on the basis of the protein domain composition.

<sup>c</sup> Functional annotation of the protein, provided by UniprotKB database.

<sup>d</sup> BTB domains from the BTB-ZF, BTB-NPH3, BTB-Kelch, RhoBTB and MATH-BTB proteins contain additional N-terminal and/or C-terminal structural elements.

**Table S6. Full list of species and GenBank entries used for SHKBP1, KCTD17, KEAP1, KLHL2, KLHL3 and KLHL12 proteins.**

| Species                                    | GenBank accession numbers |                  |                 |                 |                 |                  |
|--------------------------------------------|---------------------------|------------------|-----------------|-----------------|-----------------|------------------|
|                                            | SHKBP1 (n = 124)          | KCTD17 (n = 139) | KEAP1 (n = 135) | KLHL2 (n = 162) | KLHL3 (n = 158) | KLHL12 (n = 129) |
| <i>Acanthaster planci</i>                  | —                         | —                | —               | XP_022079940.1  | —               | —                |
| <i>Acanthisitta chloris</i>                | —                         | XP_009082248.1   | —               | —               | —               | —                |
| <i>Acanthochromis polyacanthus</i>         | —                         | —                | XP_022046307.1  | XP_022074174.1  | XP_022075435.1  | XP_022043757.1   |
| <i>Acinonyx jubatus</i>                    | —                         | —                | XP_014933811.1  | —               | XP_014919947.1  | —                |
| <i>Acropora digitifera</i>                 | —                         | —                | —               | XP_015764133.1  | —               | —                |
| <i>Ailuropoda melanoleuca</i>              | —                         | —                | XP_002921417.1  | XP_011233125.2  | XP_011227565.2  | XP_002925475.1   |
| <i>Alligator mississippiensis</i>          | —                         | XP_019345267.1   | —               | XP_019336971.1  | KYO20331.1      | —                |
| <i>Alligator sinensis</i>                  | —                         | XP_014376482.1   | XP_006023504.1  | XP_014374102.1  | XP_014376891.1  | XP_006038484.1   |
| <i>Amazona aestiva</i>                     | —                         | KQK76492.1       | —               | —               | —               | —                |
| <i>Amphiprion ocellaris</i>                | XP_023125107.1            | —                | XP_023128544.1  | XP_023135194.1  | XP_023143999.1  | XP_023131332.1   |
| <i>Anas platyrhynchos</i>                  | —                         | EOB03950.1       | —               | —               | XP_005018740.1  | —                |
| <i>Anolis carolinensis</i>                 | —                         | XP_008108870.1   | XP_003216447.1  | XP_008116333.1  | XP_008103098.1  | XP_003220513.1   |
| <i>Anser cygnoides domesticus</i>          | —                         | XP_013036383.1   | —               | XP_013030701.1  | XP_013031336.1  | —                |
| <i>Antrostomus carolinensis</i>            | —                         | XP_010160965.1   | —               | —               | KFZ58705.1      | —                |
| <i>Aotus nancymae</i>                      | —                         | XP_012331822.1   | XP_012291394.1  | XP_021530947.1  | XP_012290872.1  | —                |
| <i>Aplysia californica</i>                 | —                         | —                | —               | XP_005099881.1  | —               | —                |
| <i>Aptenodytes forsteri</i>                | —                         | XP_009288225.2   | —               | XP_009270590.1  | KFM12065.1      | XP_009280168.1   |
| <i>Apteryx australis mantelli</i>          | —                         | XP_013802726.1   | —               | XP_013797640.1  | —               | —                |
| <i>Aquila chrysaetos canadensis</i>        | —                         | XP_011592211.1   | —               | XP_011572555.1  | XP_011569540.1  | —                |
| <i>Astyanax mexicanus</i>                  | XP_022535160.1            | —                | XP_007231370.1  | XP_022537500.1  | XP_007246470.2  | XP_022526735.1   |
| <i>Austrofundulus limnaeus</i>             | XP_013889136.1            | —                | XP_013860381.1  | XP_013875667.1  | —               | XP_013871669.1   |
| <i>Balaenoptera acutorostrata scammoni</i> | XP_007166868.1            | XP_007165722.1   | —               | XP_007176776.1  | —               | —                |
| <i>Balearica regulorum gibbericeps</i>     | —                         | KFO11200.1       | —               | XP_010297540.1  | —               | —                |
| <i>Bison bison bison</i>                   | XP_010847541.1            | XP_010858924.1   | XP_010826664.1  | —               | XP_010842774.1  | —                |
| <i>Boleophthalmus pectinirostris</i>       | XP_020794892.1            | —                | XP_020794190.1  | XP_020788618.1  | XP_020779108.1  | XP_020785201.1   |
| <i>Bos indicus</i>                         | XP_019833810.1            | XP_019816894.1   | —               | —               | XP_019820522.1  | —                |
| <i>Bos mutus</i>                           | ELR60093.1                | XP_014333583.1   | ELR51175.1      | XP_005898408.1  | —               | —                |
| <i>Bos taurus</i>                          | NP_001076076.1            | —                | NP_001094612.1  | XP_005217484.1  | XP_612749.5     | —                |
| <i>Branchiostoma belcheri</i>              | —                         | —                | —               | XP_019635414.1  | —               | —                |
| <i>Bubalus bubalis</i>                     | XP_006050123.1            | XP_006057052.1   | XP_006068412.1  | XP_006073262.1  | —               | XP_006078512.1   |
| <i>Buceros rhinoceros silvestris</i>       | —                         | XP_010143072.1   | —               | —               | —               | —                |
| <i>Calidris pugnax</i>                     | —                         | XP_014819558.1   | —               | —               | —               | —                |
| <i>Callithrix jacchus</i>                  | XP_008986284.1            | XP_017819005.1   | —               | XP_002745302.1  | —               | XP_008983687.1   |
| <i>Callorhinchus milii</i>                 | —                         | —                | XP_007907175.1  | XP_007904738.1  | —               | XP_007899790.1   |
| <i>Calypte anna</i>                        | —                         | XP_008494604.1   | —               | XP_008492043.1  | KFO97435.1      | —                |
| <i>Camelus bactrianus</i>                  | XP_010945566.1            | XP_010958659.1   | —               | —               | —               | XP_010954536.1   |
| <i>Camelus dromedarius</i>                 | —                         | XP_010993082.1   | —               | —               | —               | —                |

| <b>Species</b>                      | <b>SHKBP1 (n = 124)</b> | <b>KCTD17 (n = 139)</b> | <b>KEAP1 (n = 135)</b> | <b>KLHL2 (n = 162)</b> | <b>KLHL3 (n = 158)</b> | <b>KLHL12 (n = 129)</b> |
|-------------------------------------|-------------------------|-------------------------|------------------------|------------------------|------------------------|-------------------------|
| <i>Camelus ferus</i>                | XP_006177980.1          | —                       | XP_006179430.1         | XP_006190874.1         | XP_006180366.1         | XP_006173510.2          |
| <i>Canis lupus familiaris</i>       | XP_533665.2             | —                       | XP_533917.2            | —                      | XP_005626632.1         | XP_537119.2             |
| <i>Capra hircus</i>                 | XP_017917921.1          | XP_017903788.1          | —                      | —                      | —                      | XP_013825912.1          |
| <i>Cariama cristata</i>             | —                       | XP_009708538.1          | —                      | XP_009707350.1         | XP_009707735.1         | —                       |
| <i>Carlito syricta</i>              | —                       | —                       | XP_008049111.2         | XP_021568132.1         | —                      | —                       |
| <i>Castor canadensis</i>            | XP_020022544.1          | XP_020008051.1          | XP_020029886.1         | —                      | —                      | —                       |
| <i>Cavia porcellus</i>              | XP_003462052.1          | —                       | —                      | XP_003479693.2         | XP_003473223.2         | XP_003474875.1          |
| <i>Cebus capucinus imitator</i>     | XP_017358686.1          | XP_017364405.1          | —                      | —                      | XP_017356455.1         | —                       |
| <i>Ceratotherium simum simum</i>    | XP_004441608.1          | XP_014636452.1          | XP_004442687.1         | XP_014645362.1         | XP_004420216.1         | XP_014649616.1          |
| <i>Cercocebus atys</i>              | XP_011942145.1          | XP_011893527.1          | XP_011949164.1         | —                      | —                      | XP_011893112.1          |
| <i>Chaetura pelagica</i>            | —                       | XP_010004144.1          | —                      | XP_009994230.1         | KFU83910.1             | XP_009997930.1          |
| <i>Charadrius vociferus</i>         | —                       | XP_009880208.1          | —                      | —                      | XP_009889406.1         | —                       |
| <i>Chelonia mydas</i>               | —                       | XP_007062699.1          | —                      | XP_007067100.1         | XP_007053651.1         | XP_007057964.1          |
| <i>Chinchilla lanigera</i>          | XP_005414100.1          | XP_005379244.1          | XP_013360585.1         | XP_013368945.1         | XP_005376559.1         | XP_005375289.1          |
| <i>Chlorocebus sabaesus</i>         | —                       | XP_007973871.1          | —                      | —                      | XP_008012737.1         | —                       |
| <i>Chrysemys picta bellii</i>       | —                       | XP_005302503.1          | XP_005279608.1         | XP_005307496.1         | XP_005295945.1         | XP_005311075.1          |
| <i>Chrysochloris asiatica</i>       | XP_006871474.1          | XP_006865277.1          | XP_006875157.1         | XP_006864603.1         | XP_006866164.1         | XP_006834185.1          |
| <i>Ciona intestinalis</i>           | —                       | —                       | —                      | —                      | XP_009862126.1         | —                       |
| <i>Clupea harengus</i>              | —                       | —                       | XP_012694314.1         | XP_012686788.1         | XP_012689714.1         | —                       |
| <i>Colius striatus</i>              | —                       | —                       | —                      | —                      | XP_010202177.1         | —                       |
| <i>Colobus angolensis palliatus</i> | XP_011807875.1          | —                       | XP_011810238.1         | —                      | —                      | —                       |
| <i>Columba livia</i>                | —                       | XP_021138056.1          | —                      | XP_005502561.1         | XP_005503512.2         | —                       |
| <i>Condylura cristata</i>           | XP_004694187.1          | XP_017593373.1          | XP_004688795.1         | XP_012580367.1         | XP_004686812.1         | XP_004685574.1          |
| <i>Corvus brachyrhynchos</i>        | —                       | —                       | —                      | XP_008636811.1         | KFO58285.1             | XP_008636237.1          |
| <i>Corvus cornix cornix</i>         | —                       | XP_019148111.1          | —                      | —                      | —                      | —                       |
| <i>Coturnix japonica</i>            | —                       | XP_015717966.1          | —                      | XP_015716366.1         | XP_015731168.1         | XP_015740339.1          |
| <i>Cricetulus griseus</i>           | —                       | XP_003514245.1          | —                      | —                      | XP_007614336.1         | XP_003498896.1          |
| <i>Crassostrea virginica</i>        | —                       | —                       | —                      | XP_022318258.1         | —                      | —                       |
| <i>Cricetulus griseus</i>           | —                       | —                       | XP_003499782.1         | XP_007638805.1         | —                      | —                       |
| <i>Crocodylus porosus</i>           | —                       | XP_019400405.1          | —                      | XP_019390124.1         | XP_019390681.1         | —                       |
| <i>Cuculus canorus</i>              | —                       | XP_009566732.1          | —                      | XP_009563451.1         | —                      | XP_009558874.1          |
| <i>Cyanistes caeruleus</i>          | —                       | XP_023791561.1          | —                      | —                      | —                      | —                       |
| <i>Cynoglossus semilaevis</i>       | XP_008307749.1          | —                       | XP_008315818.2         | XP_008315684.1         | XP_016894992.1         | XP_008317759.1          |
| <i>Cyprinodon variegatus</i>        | —                       | —                       | XP_015254374.1         | XP_015239330.1         | XP_015228777.1         | —                       |
| <i>Cyprinus carpio</i>              | —                       | —                       | —                      | —                      | —                      | XP_018964306.1          |
| <i>Danio rerio</i>                  | XP_001920935.4          | —                       | NP_001106948.1         | XP_021329567.1         | —                      | NP_001007329.1          |
| <i>Dasyypus novemcinctus</i>        | —                       | —                       | —                      | —                      | XP_004450558.1         | —                       |
| <i>Delphinapterus leucas</i>        | XP_022441330.1          | XP_022452419.1          | —                      | —                      | —                      | XP_022417643.1          |
| <i>Desmodus rotundus</i>            | —                       | XP_024434983.1          | —                      | —                      | —                      | —                       |
| <i>Dipodomys ordii</i>              | XP_012888217.1          | —                       | XP_012889414.1         | XP_012881565.1         | XP_012871485.1         | —                       |
| <i>Echinops telfairi</i>            | XP_004710557.1          | XP_012859580.1          | XP_004716860.1         | XP_004717436.1         | —                      | —                       |
| <i>Egretta garzetta</i>             | —                       | XP_009646023.1          | —                      | XP_009634645.1         | —                      | —                       |

| <b>Species</b>                    | <b>SHKBP1 (n = 124)</b> | <b>KCTD17 (n = 139)</b> | <b>KEAP1 (n = 135)</b> | <b>KLHL2 (n = 162)</b> | <b>KLHL3 (n = 158)</b> | <b>KLHL12 (n = 129)</b> |
|-----------------------------------|-------------------------|-------------------------|------------------------|------------------------|------------------------|-------------------------|
| <i>Elephantulus edwardii</i>      | XP_006900961.1          | XP_006890212.1          | XP_006898831.1         | XP_006896716.1         | XP_006899557.1         | —                       |
| <i>Enhydra lutris kenyonii</i>    | XP_022380965.1          | —                       | XP_022382690.1         | XP_022370359.1         | XP_022348825.1         | XP_022364617.1          |
| <i>Eptesicus fuscus</i>           | XP_008137806.1          | XP_008142891.1          | XP_008156282.1         | XP_008142537.1         | XP_008140142.1         | —                       |
| <i>Equus asinus</i>               | XP_014715764.1          | XP_014706708.1          | XP_014721012.1         | —                      | XP_014683945.1         | —                       |
| <i>Equus caballus</i>             | XP_003362363.2          | XP_023487576.1          | XP_001492331.3         | XP_005607800.1         | XP_001504377.2         | XP_001495985.1          |
| <i>Equus przewalskii</i>          | XP_008532834.1          | —                       | —                      | —                      | XP_008512037.1         | XP_008524709.1          |
| <i>Erinaceus europaeus</i>        | XP_007536779.1          | XP_007519412.1          | XP_007526023.1         | —                      | XP_007517633.1         | XP_007522166.1          |
| <i>Esox lucius</i>                | XP_010890266.1          | —                       | XP_010871089.1         | —                      | XP_019901531.1         | XP_010888908.1          |
| <i>Exaiptasia pallida</i>         | —                       | —                       | —                      | XP_020894482.1         | —                      | —                       |
| <i>Falco cherrug</i>              | —                       | —                       | —                      | —                      | XP_005440701.2         | XP_005447275.1          |
| <i>Falco peregrinus</i>           | —                       | —                       | —                      | XP_005230556.1         | XP_005242799.2         | —                       |
| <i>Felis catus</i>                | XP_003997840.1          | XP_023113233.1          | XP_023101067.1         | —                      | XP_019688114.1         | XP_019677561.1          |
| <i>Ficedula albicollis</i>        | —                       | XP_005039846.1          | —                      | —                      | XP_016157084.1         | XP_005059410.1          |
| <i>Fukomys damarensis</i>         | XP_010612769.1          | —                       | —                      | XP_010628165.1         | XP_010612413.1         | KFO24396.1              |
| <i>Fulmarus glacialis</i>         | —                       | XP_009572356.1          | —                      | —                      | —                      | —                       |
| <i>Fundulus heteroclitus</i>      | XP_021164550.1          | —                       | XP_012705937.1         | XP_012725245.1         | XP_021168459.1         | XP_012730968.1          |
| <i>Galeopterus variegatus</i>     | —                       | —                       | XP_008561317.1         | —                      | XP_008573655.1         | —                       |
| <i>Gallus gallus</i>              | —                       | XP_004937809.2          | —                      | NP_001264749.1         | XP_015149440.1         | XP_015154220.1          |
| <i>Gavia stellata</i>             | —                       | XP_009813946.1          | —                      | —                      | KFV59300.1             | —                       |
| <i>Gavialis gangeticus</i>        | —                       | XP_019370816.1          | —                      | XP_019377290.1         | XP_019361778.1         | —                       |
| <i>Gekko japonicus</i>            | —                       | XP_015281963.1          | —                      | —                      | —                      | —                       |
| <i>Geospiza fortis</i>            | —                       | XP_005421877.1          | —                      | XP_005415620.1         | XP_005418758.1         | XP_005426852.1          |
| <i>Gorilla gorilla gorilla</i>    | —                       | XP_018874316.1          | —                      | —                      | —                      | —                       |
| <i>Haliaeetus leucocephalus</i>   | —                       | XP_010583711.1          | —                      | —                      | XP_010577185.1         | —                       |
| <i>Haliaeetus albicilla</i>       | —                       | —                       | —                      | XP_009928870.1         | —                      | —                       |
| <i>Haplochromis burtoni</i>       | —                       | —                       | XP_014196664.1         | —                      | —                      | —                       |
| <i>Heterocephalus glaber</i>      | XP_004874267.1          | XP_012927957.1          | EHB12931.1             | XP_004848282.1         | XP_004836251.1         | EHB03738.1              |
| <i>Hippocampus comes</i>          | —                       | —                       | XP_019717662.1         | XP_019717542.1         | XP_019739597.1         | XP_019744013.1          |
| <i>Hipposideros armiger</i>       | XP_019485272.1          | XP_019520201.1          | XP_019514927.1         | —                      | XP_019517118.1         | XP_019493677.1          |
| <i>Homo sapiens</i>               | XP_006723537.1          | NP_001269613.1          | XP_011526754.1         | NP_009177.3            | NP_059111.2            | NP_067646.1             |
| <i>Ictalurus punctatus</i>        | XP_017322144.1          | XP_017339989.1          | XP_017337726.1         | XP_017316882.1         | XP_017329595.1         | XP_017324276.1          |
| <i>Ictidomys tridecemlineatus</i> | XP_005336496.1          | XP_005322340.1          | XP_005336185.1         | XP_013215786.1         | XP_005333265.1         | XP_005330387.1          |
| <i>Jaculus jaculus</i>            | —                       | XP_012804799.1          | XP_004667509.1         | XP_004657220.1         | XP_004665149.1         | —                       |
| <i>Kryptolebias marmoratus</i>    | —                       | —                       | XP_017285965.1         | XP_017261728.1         | XP_017273010.1         | XP_017294510.1          |
| <i>Labrus bergylta</i>            | XP_020514016.1          | —                       | XP_020503327.1         | XP_020502841.1         | —                      | XP_020493361.1          |
| <i>Larimichthys crocea</i>        | XP_019133021.1          | —                       | XP_019129802.1         | XP_010747705.1         | XP_010741230.1         | XP_019108919.1          |
| <i>Lates calcarifer</i>           | —                       | —                       | XP_018520553.1         | XP_018546403.1         | XP_018549229.1         | XP_018542865.1          |
| <i>Latimeria chalumnae</i>        | —                       | —                       | XP_005994373.1         | —                      | XP_005991519.1         | XP_005988446.1          |
| <i>Lepidothrix coronata</i>       | —                       | —                       | —                      | XP_017661316.1         | XP_017683358.1         | XP_017676878.1          |
| <i>Lepisosteus oculatus</i>       | XP_006627705.1          | —                       | —                      | —                      | —                      | XP_015197756.1          |
| <i>Leptoonychotes weddellii</i>   | —                       | XP_006751188.1          | XP_006741120.1         | —                      | —                      | —                       |
| <i>Leptosomus discolor</i>        | —                       | —                       | —                      | XP_009950311.1         | KFQ10383.1             | KFP98732.1              |

| Species                                            | SHKBP1 (n = 124) | KCTD17 (n = 139) | KEAP1 (n = 135) | KLHL2 (n = 162) | KLHL3 (n = 158) | KLHL12 (n = 129) |
|----------------------------------------------------|------------------|------------------|-----------------|-----------------|-----------------|------------------|
| <i>Limosa lapponica baueri</i>                     | —                | —                | —               | —               | —               | PKU41125.1       |
| <i>Lingula anatina</i>                             | —                | —                | —               | —               | XP_013388754.1  | —                |
| <i>Lipotes vexillifer</i>                          | XP_007458702.1   | XP_007454129.1   | —               | XP_007471591.1  | XP_007461459.1  | XP_007456221.1   |
| <i>Lonchura striata domestica</i>                  | —                | XP_021409774.1   | —               | XP_021405931.1  | XP_021407958.1  | —                |
| <i>Loxodonta africana</i>                          | —                | XP_023415713.1   | XP_003413141.1  | XP_010593899.1  | XP_010589155.1  | XP_003410281.1   |
| <i>Macaca fascicularis</i>                         | XP_005589339.1   | XP_005567444.1   | —               | —               | —               | —                |
| <i>Macaca mulatta</i>                              | XP_014979475.1   | NP_001252736.1   | —               | XP_001100501.1  | NP_001252766.1  | —                |
| <i>Macaca nemestrina</i>                           | XP_011763031.1   | XP_011710770.2   | —               | XP_011714137.1  | XP_011714779.1  | —                |
| <i>Manacus vitellinus</i>                          | —                | —                | —               | XP_008931371.1  | KFW78569.1      | XP_008927962.2   |
| <i>Mandrillus leucophaeus</i>                      | XP_011839136.1   | —                | XP_011849866.1  | XP_011823166.1  | XP_011824557.1  | —                |
| <i>Manis javanica</i>                              | XP_017528133.1   | XP_017508523.1   | XP_017495620.1  | XP_017511714.1  | XP_017513581.1  | XP_017514597.1   |
| <i>Marmota marmota marmota</i>                     | XP_015352327.1   | —                | —               | XP_015341732.1  | —               | —                |
| <i>Maylandia zebra</i>                             | XP_004565061.1   | —                | XP_004567922.1  | XP_004549335.1  | XP_004553661.1  | XP_004546484.1   |
| <i>Meleagris gallopavo</i>                         | —                | XP_019470588.1   | —               | XP_010707769.1  | —               | —                |
| <i>Melopsittacus undulatus</i>                     | —                | —                | —               | XP_005145559.1  | —               | —                |
| <i>Meriones unguiculatus</i>                       | XP_021506303.1   | XP_021492399.1   | XP_021504873.1  | XP_021493522.1  | —               | —                |
| <i>Merops nubicus</i>                              | —                | —                | —               | —               | KFQ31548.1      | —                |
| <i>Mesitornis unicolor</i>                         | —                | XP_010188342.1   | —               | —               | —               | —                |
| <i>Mesocricetus auratus</i>                        | XP_005086624.1   | XP_005067012.1   | XP_005078609.1  | XP_005075242.1  | XP_021087667.1  | —                |
| <i>Microcebus murinus</i>                          | XP_012630007.1   | XP_012642587.1   | XP_012646096.1  | XP_012626034.1  | XP_020137732.1  | XP_012599823.1   |
| <i>Microtus ochrogaster</i>                        | XP_005371646.1   | XP_005354301.1   | XP_005346939.1  | XP_005367805.1  | —               | XP_005348437.1   |
| <i>Miniopterus natalensis</i>                      | XP_016064707.1   | —                | XP_016063423.1  | XP_016053241.1  | XP_016059235.1  | —                |
| <i>Mizuhopecten yessoensis</i>                     | —                | —                | —               | XP_021358880.1  | —               | —                |
| <i>Monodelphis domestica</i>                       | XP_007492042.1   | XP_016281346.1   | XP_007488618.1  | XP_007496215.1  | XP_007473357.1  | —                |
| <i>Monopterus albus</i>                            | —                | —                | XP_020452724.1  | XP_020476449.1  | XP_020463137.1  | XP_020473490.1   |
| <i>Mus caroli</i>                                  | XP_021021679.1   | XP_021038727.1   | XP_021027535.1  | —               | —               | —                |
| <i>Mus musculus</i>                                | XP_006539730.2   | XP_006521523.2   | NP_057888.1     | XP_017168500.1  | XP_006517071.1  | NP_001298065.1   |
| <i>Mus pahari</i>                                  | XP_021049670.1   | XP_021072585.1   | XP_021062655.1  | —               | XP_021071267.1  | XP_021053254.1   |
| <i>Mustela putorius furo</i>                       | XP_004776173.1   | XP_012907038.1   | XP_004748492.1  | XP_004779602.2  | XP_012907923.1  | XP_012913608.1   |
| <i>Myotis brandtii</i>                             | XP_005868856.1   | —                | XP_005859245.1  | XP_014390466.1  | XP_005881064.1  | XP_005886426.1   |
| <i>Myotis davidii</i>                              | XP_006759262.1   | —                | ELK28701.1      | XP_015424193.1  | —               | XP_006757531.1   |
| <i>Myotis lucifugus</i>                            | —                | XP_006107324.2   | XP_006104108.1  | XP_014311670.1  | —               | —                |
| <i>Nannospalax galili</i>                          | XP_008852225.1   | XP_008849546.1   | XP_008848262.1  | XP_008829715.1  | XP_008830034.1  | XP_008828554.1   |
| <i>Nanorana parkeri</i>                            | —                | —                | XP_018431113.1  | —               | —               | XP_018412396.1   |
| <i>Neolamprologus brichardi</i>                    | XP_006801280.1   | —                | XP_006787448.1  | —               | —               | XP_006794161.1   |
| <i>Neomonachus schauinslandi</i>                   | XP_021556625.1   | —                | —               | —               | —               | —                |
| <i>Neophocaena asiaeorientalis asiaeorientalis</i> | XP_024624432.1   | XP_024617351.1   | —               | —               | —               | —                |
| <i>Nestor notabilis</i>                            | —                | XP_010017253.1   | —               | —               | —               | —                |
| <i>Nipponia nippon</i>                             | —                | XP_009473450.1   | —               | XP_009473047.1  | KFQ93934.1      | —                |
| <i>Nomascus leucogenys</i>                         | XP_012352070.1   | XP_003264762.1   | —               | XP_003257978.1  | XP_003266467.1  | XP_003264617.1   |
| <i>Nothobranchius furzeri</i>                      | XP_015806312.1   | —                | —               | XP_015797306.1  | —               | XP_015824029.1   |
| <i>Nothothenia coriiceps</i>                       | —                | —                | XP_010766987.1  | XP_010789689.1  | —               | —                |

| Species                               | SHKBP1 (n = 124) | KCTD17 (n = 139) | KEAP1 (n = 135) | KLHL2 (n = 162) | KLHL3 (n = 158) | KLHL12 (n = 129) |
|---------------------------------------|------------------|------------------|-----------------|-----------------|-----------------|------------------|
| <i>Numida meleagris</i>               | —                | XP_021241564.1   | —               | XP_021250584.1  | —               | XP_021232836.1   |
| <i>Ochotona princeps</i>              | XP_004598066.1   | XP_004589821.2   | XP_004600089.2  | XP_004591480.1  | XP_004586491.1  | XP_004578811.1   |
| <i>Octodon degus</i>                  | XP_004648039.1   | —                | XP_004632901.1  | XP_004630664.1  | XP_004632291.1  | XP_004625419.1   |
| <i>Octopus bimaculoides</i>           | —                | —                | —               | XP_014770021.1  | —               | —                |
| <i>Odobenus rosmarus divergens</i>    | XP_004396404.1   | —                | XP_004398925.1  | XP_004411320.2  | XP_004397909.1  | XP_004392834.2   |
| <i>Odocoileus virginianus texanus</i> | XP_020759499.1   | —                | XP_020758035.1  | —               | XP_020748682.1  | XP_020759424.1   |
| <i>Oncorhynchus kisutch</i>           | XP_020363280.1   | —                | —               | —               | XP_020357787.1  | XP_020315264.1   |
| <i>Oncorhynchus mykiss</i>            | XP_021443142.1   | —                | XP_021412413.1  | —               | XP_021439271.1  | XP_021421846.1   |
| <i>Oncorhynchus tshawytscha</i>       | XP_024300321.1   | —                | —               | —               | —               | —                |
| <i>Ophiophagus hannah</i>             | —                | —                | ETE73917.1      | —               | —               | ETE69140.1       |
| <i>Orbicella faveolata</i>            | —                | —                | —               | XP_020601220.1  | —               | —                |
| <i>Orcinus orca</i>                   | XP_004271317.1   | XP_012392053.1   | XP_004277407.1  | XP_004284035.1  | XP_004282135.1  | XP_012394372.1   |
| <i>Oreochromis niloticus</i>          | XP_013129084.1   | —                | XP_003447974.1  | XP_019215626.1  | XP_003443442.1  | XP_005448525.1   |
| <i>Orycteropus afer afer</i>          | XP_007941168.1   | XP_007939819.1   | XP_007951766.1  | XP_007952393.1  | XP_007937122.1  | XP_007939336.1   |
| <i>Oryctolagus cuniculus</i>          | —                | —                | XP_002723322.1  | XP_008271730.1  | XP_008253281.1  | XP_002717633.2   |
| <i>Oryzias latipes</i>                | XP_023817440.1   | —                | XP_020557948.1  | XP_020559732.1  | XP_004073059.3  | XP_004070913.1   |
| <i>Oryzias melastigma</i>             | XP_024133077.1   | —                | —               | —               | —               | —                |
| <i>Otolemur garnettii</i>             | XP_003802151.1   | XP_003783288.1   | XP_003798009.1  | —               | XP_003782213.1  | —                |
| <i>Ovis aries</i>                     | —                | —                | —               | XP_011952679.1  | XP_004008868.1  | XP_012043275.1   |
| <i>Ovis aries musimon</i>             | XP_011986482.1   | XP_012004229.1   | XP_011991418.1  | —               | XP_011971358.1  | —                |
| <i>Pan paniscus</i>                   | XP_003812529.1   | XP_003821599.2   | XP_003809635.1  | —               | XP_003829282.1  | XP_014198142.1   |
| <i>Pan troglodytes</i>                | XP_016791502.1   | XP_001160085.2   | NP_001266890.1  | XP_001150117.3  | XP_016810041.1  | —                |
| <i>Panthera pardus</i>                | XP_019287597.1   | XP_019302361.1   | —               | —               | XP_019279815.1  | —                |
| <i>Panthera tigris altaica</i>        | —                | —                | XP_007079390.1  | —               | XP_007077902.1  | —                |
| <i>Pantholops hodgsonii</i>           | XP_005963560.1   | XP_005957223.1   | —               | —               | —               | —                |
| <i>Papio anubis</i>                   | XP_017807946.1   | XP_003905544.2   | XP_003914932.1  | —               | —               | —                |
| <i>Paralichthys olivaceus</i>         | —                | —                | XP_019939843.1  | XP_019956734.1  | XP_019941392.1  | XP_019960243.1   |
| <i>Paramormyrops kingsleyae</i>       | XP_023668026.1   | —                | —               | —               | —               | —                |
| <i>Parus major</i>                    | —                | XP_015483734.1   | —               | XP_015480275.1  | —               | XP_015506363.1   |
| <i>Patagioenas fasciata monilis</i>   | —                | —                | —               | —               | OPJ88162.1      | OPJ82394.1       |
| <i>Pelecanus crispus</i>              | —                | XP_009486864.1   | —               | —               | —               | —                |
| <i>Pelodiscus sinensis</i>            | —                | XP_014434404.1   | —               | —               | —               | XP_006135792.1   |
| <i>Peromyscus maniculatus bairdii</i> | XP_006995894.1   | XP_006979168.2   | XP_006987077.1  | XP_015861554.1  | XP_006976813.2  | XP_006982523.1   |
| <i>Phascolarctos cinereus</i>         | —                | XP_020838182.1   | XP_020850692.1  | —               | —               | —                |
| <i>Phalacrocorax carbo</i>            | —                | —                | —               | KFW84676.1      | —               | —                |
| <i>Phascolarctos cinereus</i>         | —                | —                | —               | XP_020831993.1  | —               | —                |
| <i>Phoenicopterus ruber ruber</i>     | —                | KFQ81133.1       | —               | —               | —               | —                |
| <i>Physeter catodon</i>               | XP_007128153.1   | XP_007111830.1   | XP_007107317.1  | —               | XP_007112795.1  | XP_007121223.1   |
| <i>Picoides pubescens</i>             | —                | XP_009900889.1   | —               | XP_009902865.1  | KFV61276.1      | —                |
| <i>Ptilocolobus tephrosceles</i>      | XP_023084903.1   | XP_023077918.1   | —               | —               | —               | —                |
| <i>Pleuragramma antarctica</i>        | —                | —                | SCW25703.1      | —               | —               | —                |
| <i>Poecilia formosa</i>               | XP_007570740.1   | —                | XP_007551655.1  | XP_007549688.1  | XP_007577950.1  | XP_007553643.1   |

| <b>Species</b>                         | <b>SHKBP1 (n = 124)</b> | <b>KCTD17 (n = 139)</b> | <b>KEAP1 (n = 135)</b> | <b>KLHL2 (n = 162)</b> | <b>KLHL3 (n = 158)</b> | <b>KLHL12 (n = 129)</b> |
|----------------------------------------|-------------------------|-------------------------|------------------------|------------------------|------------------------|-------------------------|
| <i>Poecilia latipinna</i>              | XP_014915223.1          | —                       | XP_014907996.1         | XP_014915653.1         | XP_014902577.1         | —                       |
| <i>Poecilia mexicana</i>               | —                       | —                       | XP_014837107.1         | XP_014829877.1         | XP_014860420.1         | XP_014840751.1          |
| <i>Poecilia reticulata</i>             | XP_008400256.1          | —                       | XP_008413531.1         | XP_008400816.1         | —                      | XP_008412643.1          |
| <i>Pogona vitticeps</i>                | —                       | XP_020643409.1          | XP_020654350.1         | XP_020657605.1         | XP_020638337.1         | XP_020638148.1          |
| <i>Pongo abelii</i>                    | XP_024092291.1          | XP_003779591.1          | NP_001126406.1         | XP_002815314.1         | NP_001127192.1         | —                       |
| <i>Propithecus coquereli</i>           | XP_012512503.1          | XP_012493505.1          | XP_012496759.1         | —                      | XP_012501789.1         | —                       |
| <i>Protobothrops mucrosquamatus</i>    | —                       | XP_015687420.1          | —                      | XP_015676122.1         | —                      | XP_015671067.1          |
| <i>Pseudopodoces humilis</i>           | —                       | XP_005527632.2          | —                      | XP_005517662.1         | XP_005523584.1         | XP_005530239.1          |
| <i>Pterocles gutturalis</i>            | —                       | —                       | —                      | XP_010076229.1         | —                      | —                       |
| <i>Pteropus alecto</i>                 | XP_006905479.1          | XP_006914536.1          | —                      | —                      | —                      | XP_006908363.1          |
| <i>Pteropus vampyrus</i>               | XP_011370513.1          | XP_011385740.1          | XP_011378571.1         | XP_011362014.1         | XP_011360672.1         | —                       |
| <i>Pundamilia nyererei</i>             | —                       | —                       | XP_005752286.1         | —                      | XP_005726524.1         | XP_005731643.1          |
| <i>Pygocentrus nattereri</i>           | XP_017537184.1          | —                       | XP_017548442.1         | XP_017572936.1         | XP_017545599.1         | XP_017548954.1          |
| <i>Python bivittatus</i>               | —                       | XP_007421076.1          | XP_007426630.1         | —                      | —                      | XP_007426111.1          |
| <i>Rattus norvegicus</i>               | NP_001258009.1          | XP_008763932.2          | NP_476493.2            | XP_008770267.1         | —                      | XP_006249905.1          |
| <i>Rhinolophus sinicus</i>             | XP_019606931.1          | XP_019575200.1          | XP_019600540.1         | XP_019600193.1         | XP_019595782.1         | XP_019606448.1          |
| <i>Rhinopithecus roxellana</i>         | XP_010379143.1          | XP_010387491.1          | XP_010372068.1         | XP_010362880.1         | XP_010386363.1         | —                       |
| <i>Rousettus aegyptiacus</i>           | —                       | XP_016017310.1          | XP_016009006.1         | XP_016010073.1         | XP_016016102.1         | —                       |
| <i>Saccoglossus kowalevskii</i>        | —                       | —                       | —                      | XP_002730487.1         | —                      | —                       |
| <i>Saimiri boliviensis boliviensis</i> | XP_010329404.1          | XP_003932948.2          | XP_010347939.1         | XP_010330383.1         | XP_003934008.1         | XP_010347190.1          |
| <i>Salmo salar</i>                     | XP_014017560.1          | XP_014034374.1          | XP_013986100.1         | —                      | XP_014068166.1         | XP_014002172.1          |
| <i>Salvelinus alpinus</i>              | XP_023838330.1          | —                       | —                      | —                      | —                      | —                       |
| <i>Sarcophilus harrisii</i>            | —                       | —                       | XP_003760514.1         | —                      | —                      | XP_003767642.1          |
| <i>Scleropages formosus</i>            | XP_018598136.1          | —                       | KPP71934.1             | XP_018591491.1         | XP_018589121.1         | XP_018597687.1          |
| <i>Serinus canaria</i>                 | —                       | —                       | —                      | —                      | XP_009089645.1         | XP_009095577.1          |
| <i>Seriola dumerili</i>                | XP_022594116.1          | —                       | XP_022622580.1         | XP_022593877.1         | XP_022615920.1         | XP_022618872.1          |
| <i>Seriola lalandi dorsalis</i>        | XP_023256419.1          | —                       | XP_023274978.1         | XP_023265271.1         | XP_023253862.1         | —                       |
| <i>Sinocyclocheilus anshuiensis</i>    | —                       | —                       | XP_016349766.1         | XP_016299079.1         | XP_016310893.1         | XP_016330970.1          |
| <i>Sinocyclocheilus grahami</i>        | —                       | —                       | XP_016109850.1         | XP_016136233.1         | XP_016145128.1         | XP_016094876.1          |
| <i>Sinocyclocheilus rhinoceros</i>     | XP_016369534.1          | —                       | XP_016364948.1         | XP_016414377.1         | XP_016409147.1         | XP_016372389.1          |
| <i>Sorex araneus</i>                   | XP_004620791.1          | XP_004610551.2          | XP_004616619.1         | XP_004610419.1         | XP_012788506.1         | XP_004610091.1          |
| <i>Stegastes partitus</i>              | —                       | —                       | XP_008275180.1         | XP_008291203.1         | XP_008303524.1         | XP_008275958.1          |
| <i>Strongylocentrotus purpuratus</i>   | —                       | —                       | —                      | —                      | XP_011677555.1         | —                       |
| <i>Struthio camelus australis</i>      | —                       | XP_009682597.1          | —                      | XP_009675470.1         | —                      | —                       |
| <i>Sturnus vulgaris</i>                | —                       | —                       | —                      | —                      | XP_014738920.1         | —                       |
| <i>Stylophora pistillata</i>           | —                       | —                       | —                      | XP_022807913.1         | —                      | —                       |
| <i>Sus scrofa</i>                      | XP_020950056.1          | XP_020947187.1          | NP_001108143.1         | XP_005666707.1         | XP_020940448.1         | XP_003130659.3          |
| <i>Taeniopygia guttata</i>             | —                       | XP_012424696.1          | —                      | XP_002197028.2         | XP_002187183.3         | —                       |
| <i>Takifugu rubripes</i>               | XP_011615817.1          | —                       | XP_003972643.1         | XP_003972526.2         | XP_011609237.1         | XP_003963586.1          |
| <i>Tauraco erythrolophus</i>           | —                       | —                       | —                      | KFV09010.1             | —                      | —                       |
| <i>Thamnophis sirtalis</i>             | —                       | —                       | —                      | —                      | XP_013925240.1         | —                       |
| <i>Tinamus guttatus</i>                | —                       | XP_010222429.1          | —                      | —                      | —                      | —                       |

| <b>Species</b>                        | <b>SHKBP1 (n = 124)</b> | <b>KCTD17 (n = 139)</b> | <b>KEAP1 (n = 135)</b> | <b>KLHL2 (n = 162)</b> | <b>KLHL3 (n = 158)</b> | <b>KLHL12 (n = 129)</b> |
|---------------------------------------|-------------------------|-------------------------|------------------------|------------------------|------------------------|-------------------------|
| <i>Trichechus manatus latirostris</i> | XP_004390909.1          | XP_004373880.1          | XP_004378408.1         | XP_004390697.1         | XP_004384746.1         | XP_004375335.1          |
| <i>Tupaia chinensis</i>               | XP_006140529.1          | XP_014446395.1          | XP_006161600.1         | —                      | —                      | XP_006159222.1          |
| <i>Tursiops truncatus</i>             | —                       | XP_019774047.1          | —                      | —                      | —                      | —                       |
| <i>Tyto alba</i>                      | —                       | —                       | —                      | —                      | KFV43663.1             | —                       |
| <i>Ursus maritimus</i>                | —                       | —                       | —                      | XP_008683826.1         | —                      | —                       |
| <i>Vicugna pacos</i>                  | XP_006215068.1          | XP_015097025.1          | XP_006206340.1         | XP_006213249.1         | XP_006204669.1         | XP_006213306.2          |
| <i>Xenopus laevis</i>                 | XP_018084584.1          | —                       | XP_018111773.1         | XP_018097193.1         | —                      | XP_018104893.1          |
| <i>Xenopus tropicalis</i>             | XP_002938848.1          | —                       | NP_001008024.1         | XP_002934798.2         | —                      | —                       |
| <i>Xiphophorus maculatus</i>          | XP_014327689.1          | —                       | XP_023189591.1         | XP_005809438.1         | XP_023184792.1         | XP_023187727.1          |
| <i>Zonotrichia albicollis</i>         | —                       | XP_014123680.1          | —                      | XP_005486355.1         | —                      | —                       |

The list of species and GenBank entries contained only protein sequences: *i*) having an unambiguous description (*i.e.* including the name of the queried KCTD or BTB-Kelch protein); *ii*) that aligned with  $\geq 80\%$  sequence coverage and had  $\geq 60\%$  sequence identity with the query sequence; *iii*) that contained all the annotated domains (using the domain annotation automatically generated by the Uniprot Knowledgebase); and *iv*) without any gap in positions of the conserved domains. Proteins that did not pass these filtering steps were discarded.
